# Supplementary material for: Comparative Analysis of Epicuticular Lipids in Locusta migratoria and Calliptamus italicus: A Possible Role in Susceptibility to Entomopathogenic Fungi
Source: MDPI journal article supplement (doi:10.3390/insects13080736), 2022-08-16
Supplement: s1 [file s1]

## ELECTRONIC SUPPLEMENTARY MATERIAL

### **Comparative analysis of epicuticular lipids in *Locusta migratoria* and *Calliptamus italicus*: a possible role in susceptibility to entomopathogenic fungi**

Mariya D. Ganina<sup>1</sup>, Maksim V. Tyurin<sup>2</sup>, Ulzhalgas T. Zhumatayeva<sup>3</sup>, Georgy R. Lednev<sup>4</sup>, Sergey V. Morozov<sup>1</sup>, Vadim Yu. Kryukov<sup>2</sup>

<sup>1</sup>N.N. Vorozhtsov Novosibirsk Institute of Organic Chemistry, Siberian Branch of Russian Academy of Sciences, Academician Lavrentyev Ave. 9, Novosibirsk 630090, Russia.

<sup>2</sup>Institute of Systematics and Ecology of Animals, Siberian Branch of Russian Academy of Sciences, Frunze Str. 11, Novosibirsk 630091, Russia

<sup>3</sup>Department of Plant Protection and Quarantine, Faculty of Agrabiology, Kazakh National Agrarian Research University, Abai Avenue 8, Almaty 050010, Kazakhstan

<sup>4</sup>All-Russian Institute of Plant Protection, Podbelskogo Avenue 3, St. Petersburg, Pushkin 196608, Russia

**Text S1.** The description of linear retention indices calculation, detection of characteristic ions in mass spectra and the identification of *n*-alkanes.

GC-MS. Linear retention indices (LRI) were calculated by means of retention times of *n*-alkanes C25–C40 from paraffin during a linear temperature increase. To detect characteristic ions in minor or poorly resolved peaks, the  $3\sigma$  criterion was used. The analysis was based on a mass spectrum of a linear alkane. In the region  $m/z$  120–350, ion abundance was normalized to the most abundant ion in the mass spectrum ( $m/z$  57). Then, anamorphosis and linear regression were constructed. Interval  $\pm 3\sigma$  was built on the basis of the regression obtained along the  $y$ -axis ( $\sigma$ : standard deviation). In the mass spectra of methyl-branched alkanes, signals of putative characteristic ions were also normalized and linearized. If the abundance of an ion was above the upper limit of the  $3\sigma$  interval, then this ion was assumed to be characteristic. Otherwise, the ion was not assumed to be characteristic.

Linear alkanes in the epicuticular extracts were identified via a comparison with retention times of *n*-alkanes from a paraffin blend as well as on the basis of their mass spectra: the absence of prominent characteristic ions corresponding to decay at branch points, a prominent molecular ion, and/or the absence or very low abundance of ion M-15.

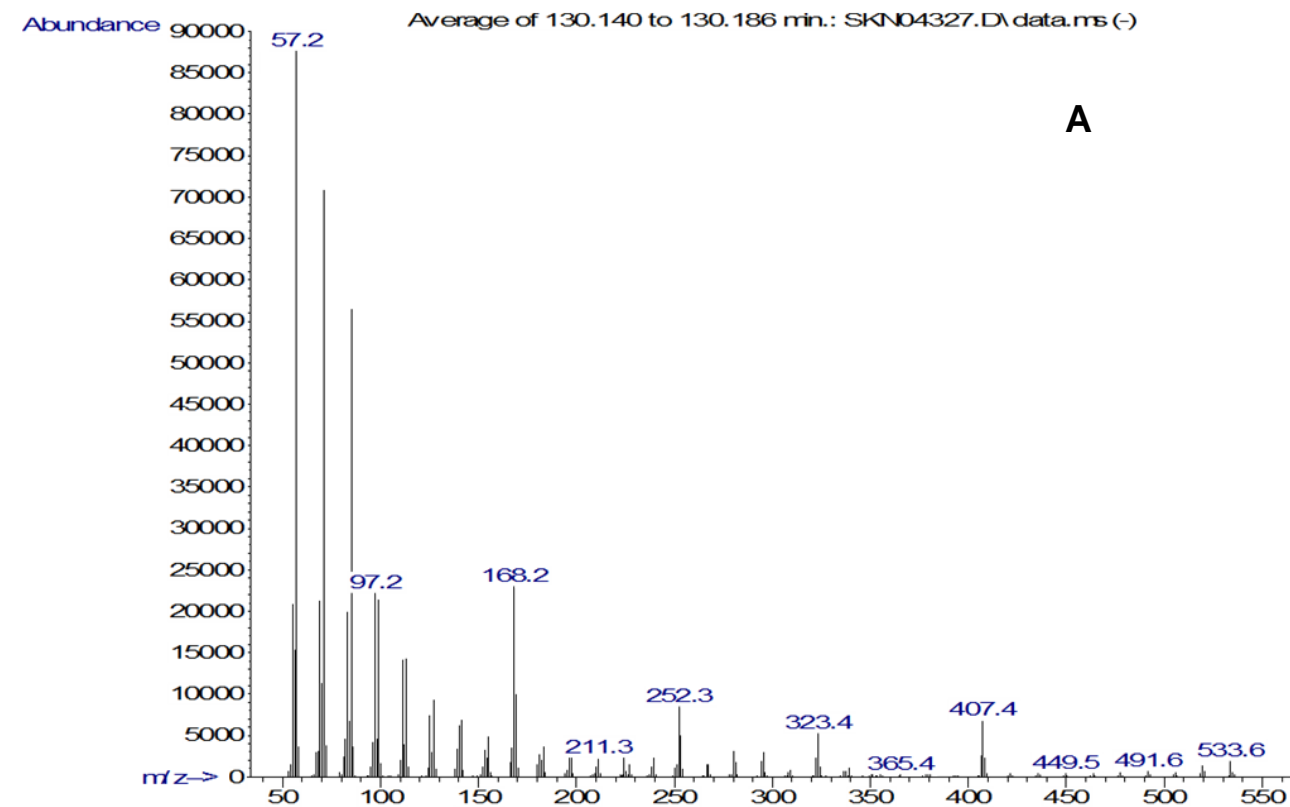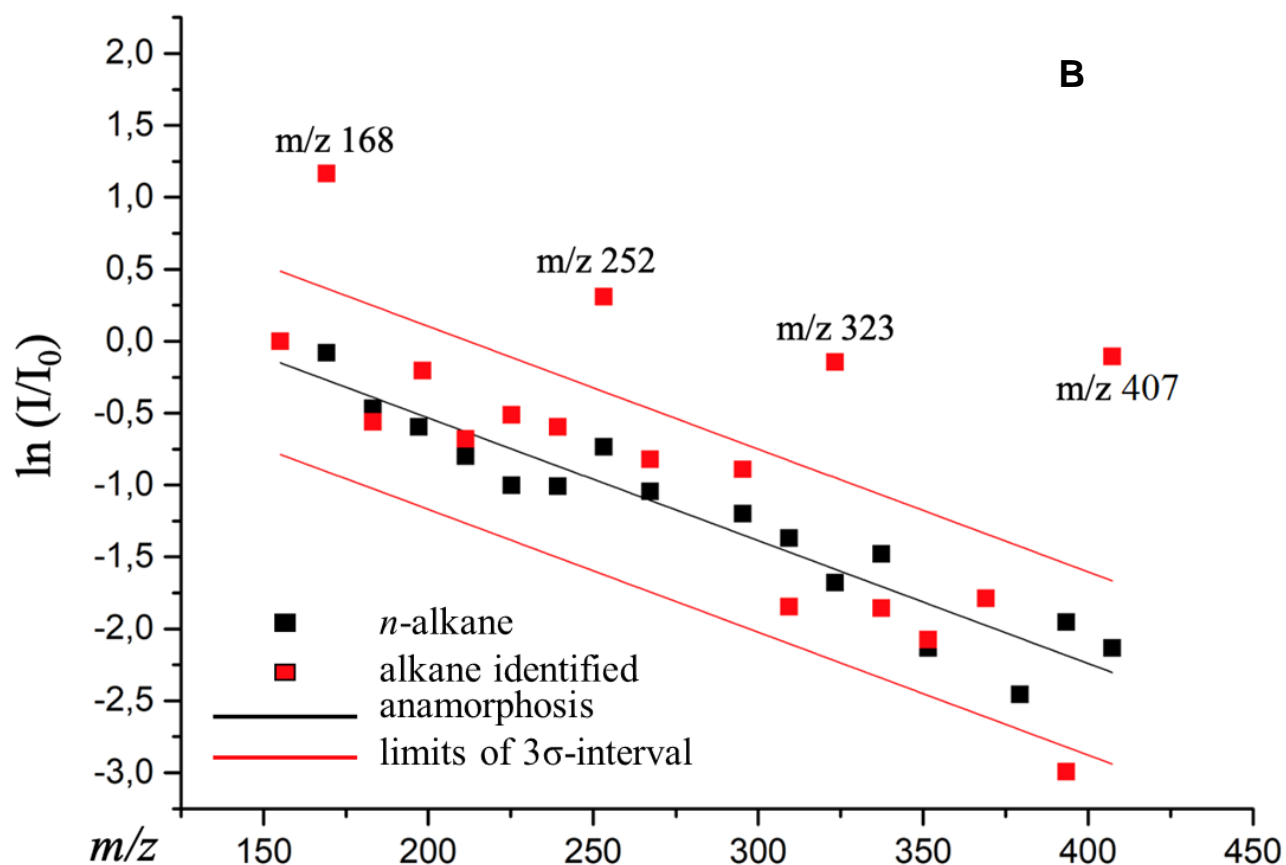

**Figure S1.** The mass spectrum of 11,21-dimethylheptatriacontane (A) and the scheme of detection of characteristic ions for this compound (B).

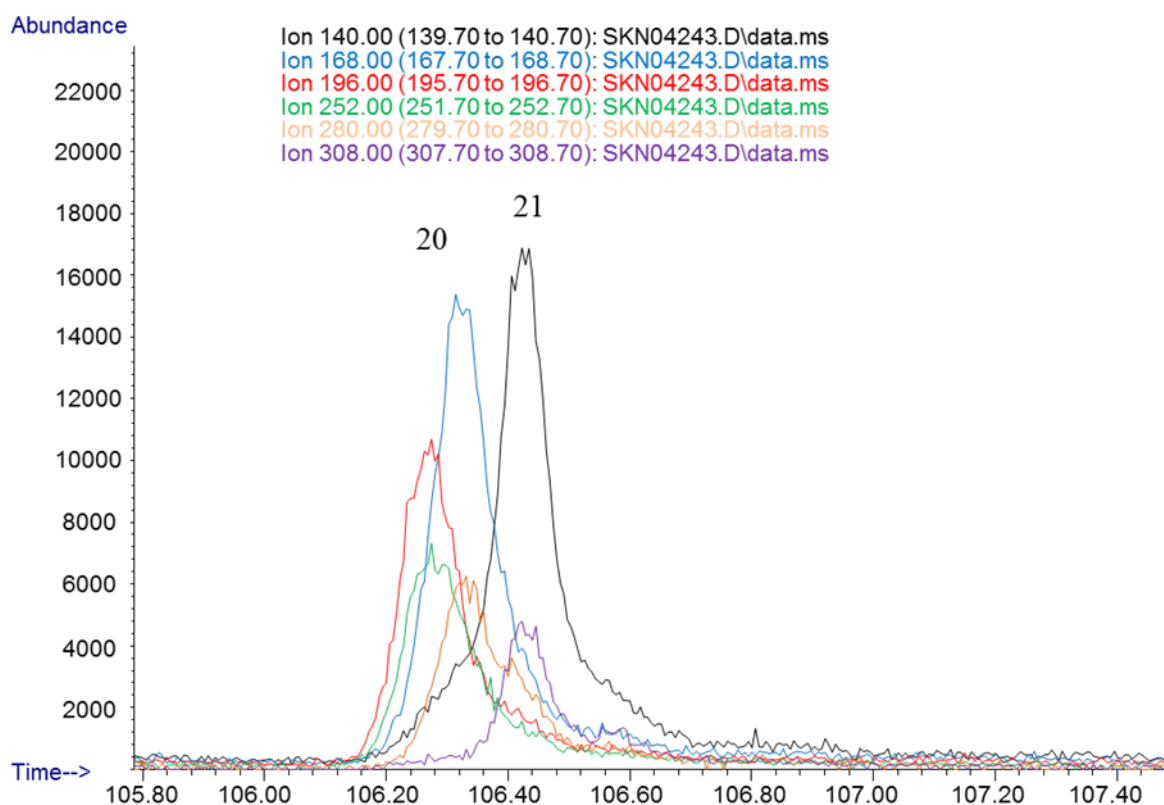

**Figure S2.** A fragment of a reconstructed chromatogram according to characteristic ions with  $m/z$  140, 168, 196, 252, 280, and 308 in the region of peaks number 20 and 21 for *L. migratoria*.

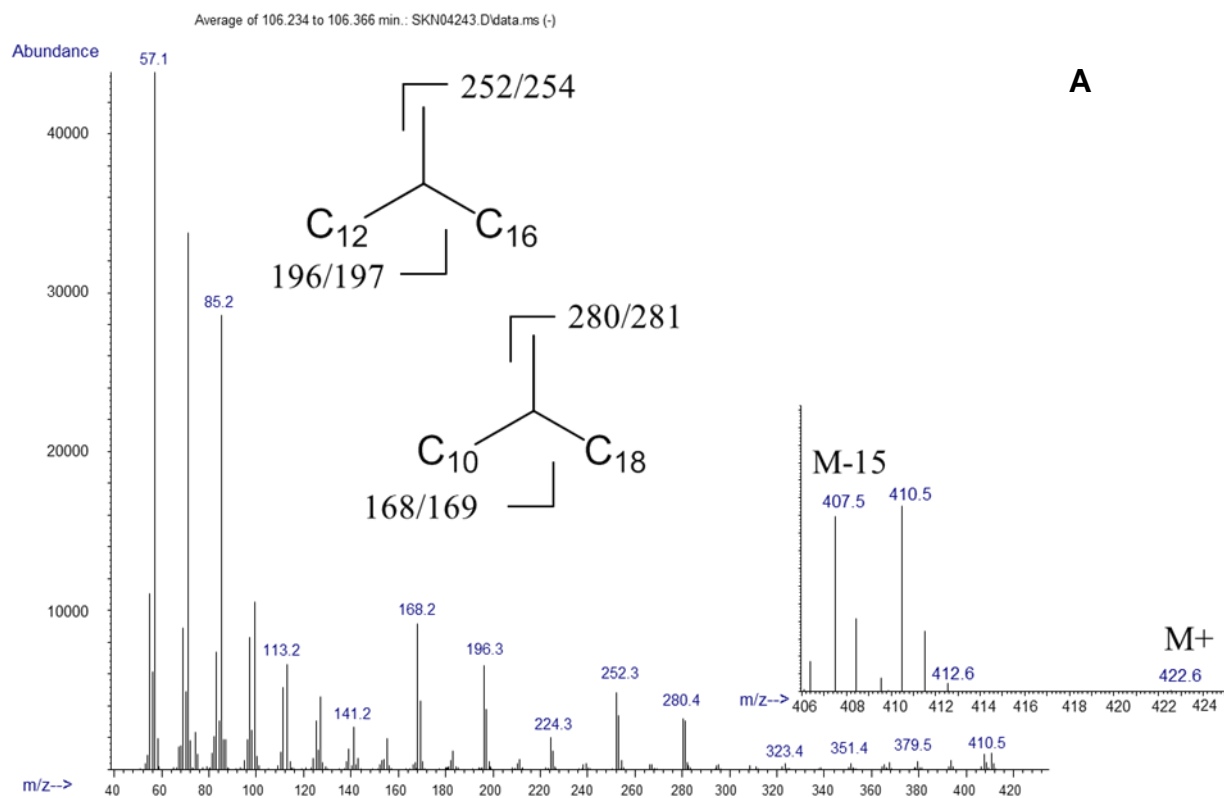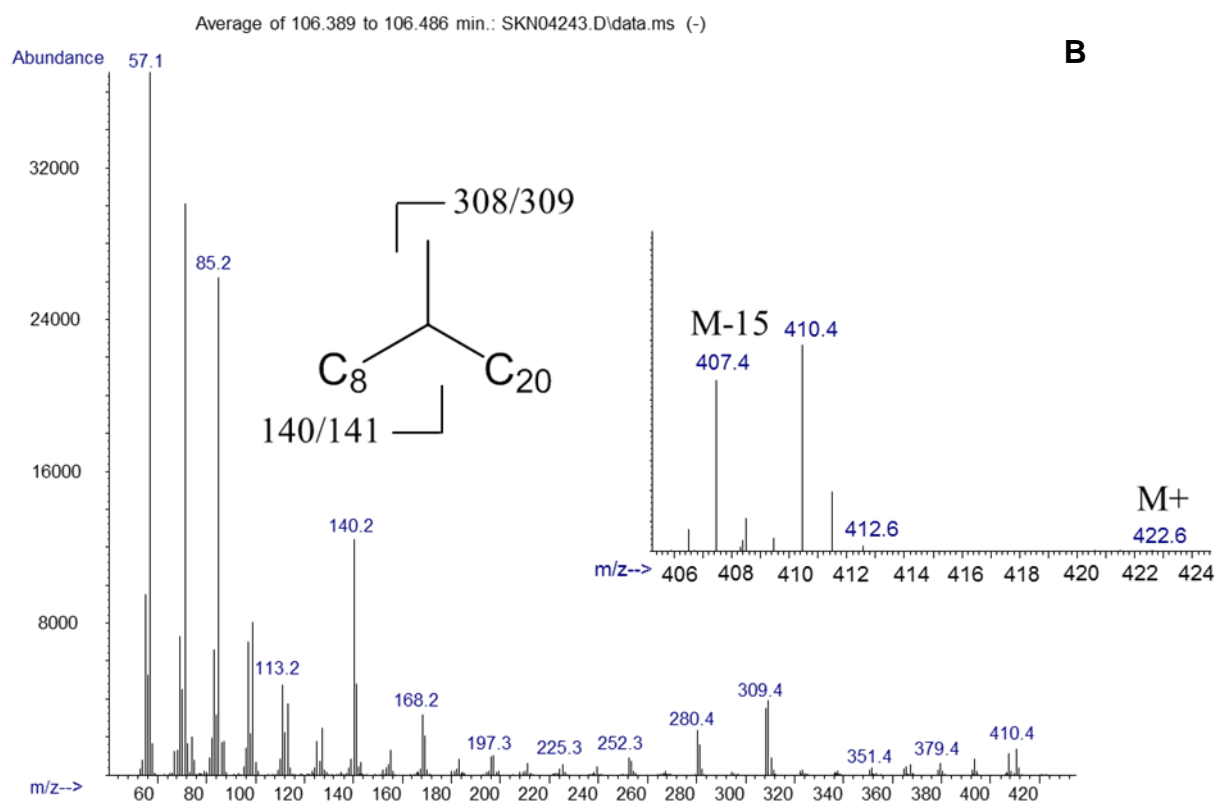

**Figure S3.** Mass spectra of peaks number 20 (13- and 11-methylnonacosane, panel A) and number 21 (9-methylnonacosane, panel B) for *L. migratoria* and the schemes of decay.

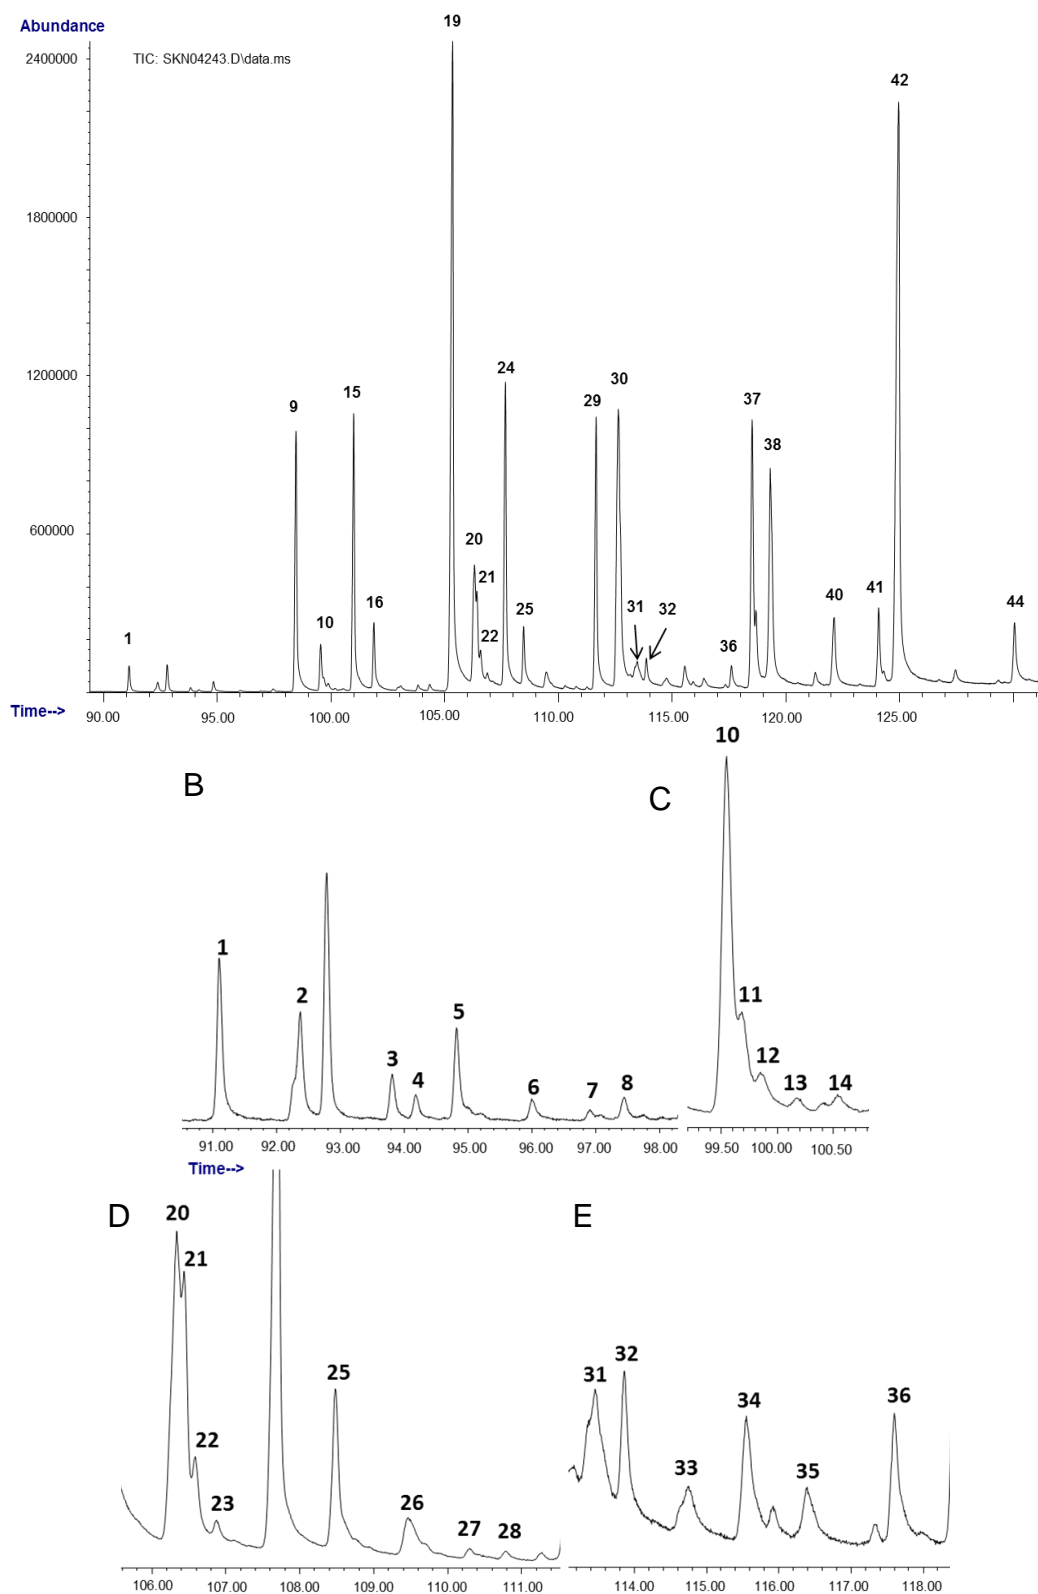

**Figure S4.** The chromatogram of the hydrocarbon profile of *L. migratoria* (A) and fragments of the chromatogram in the region of 90.5–98 min (B), 99–100.5 min (C) 106–111 min (D), and 113.5–118 min (E). Peak numbers correspond to Table S2.

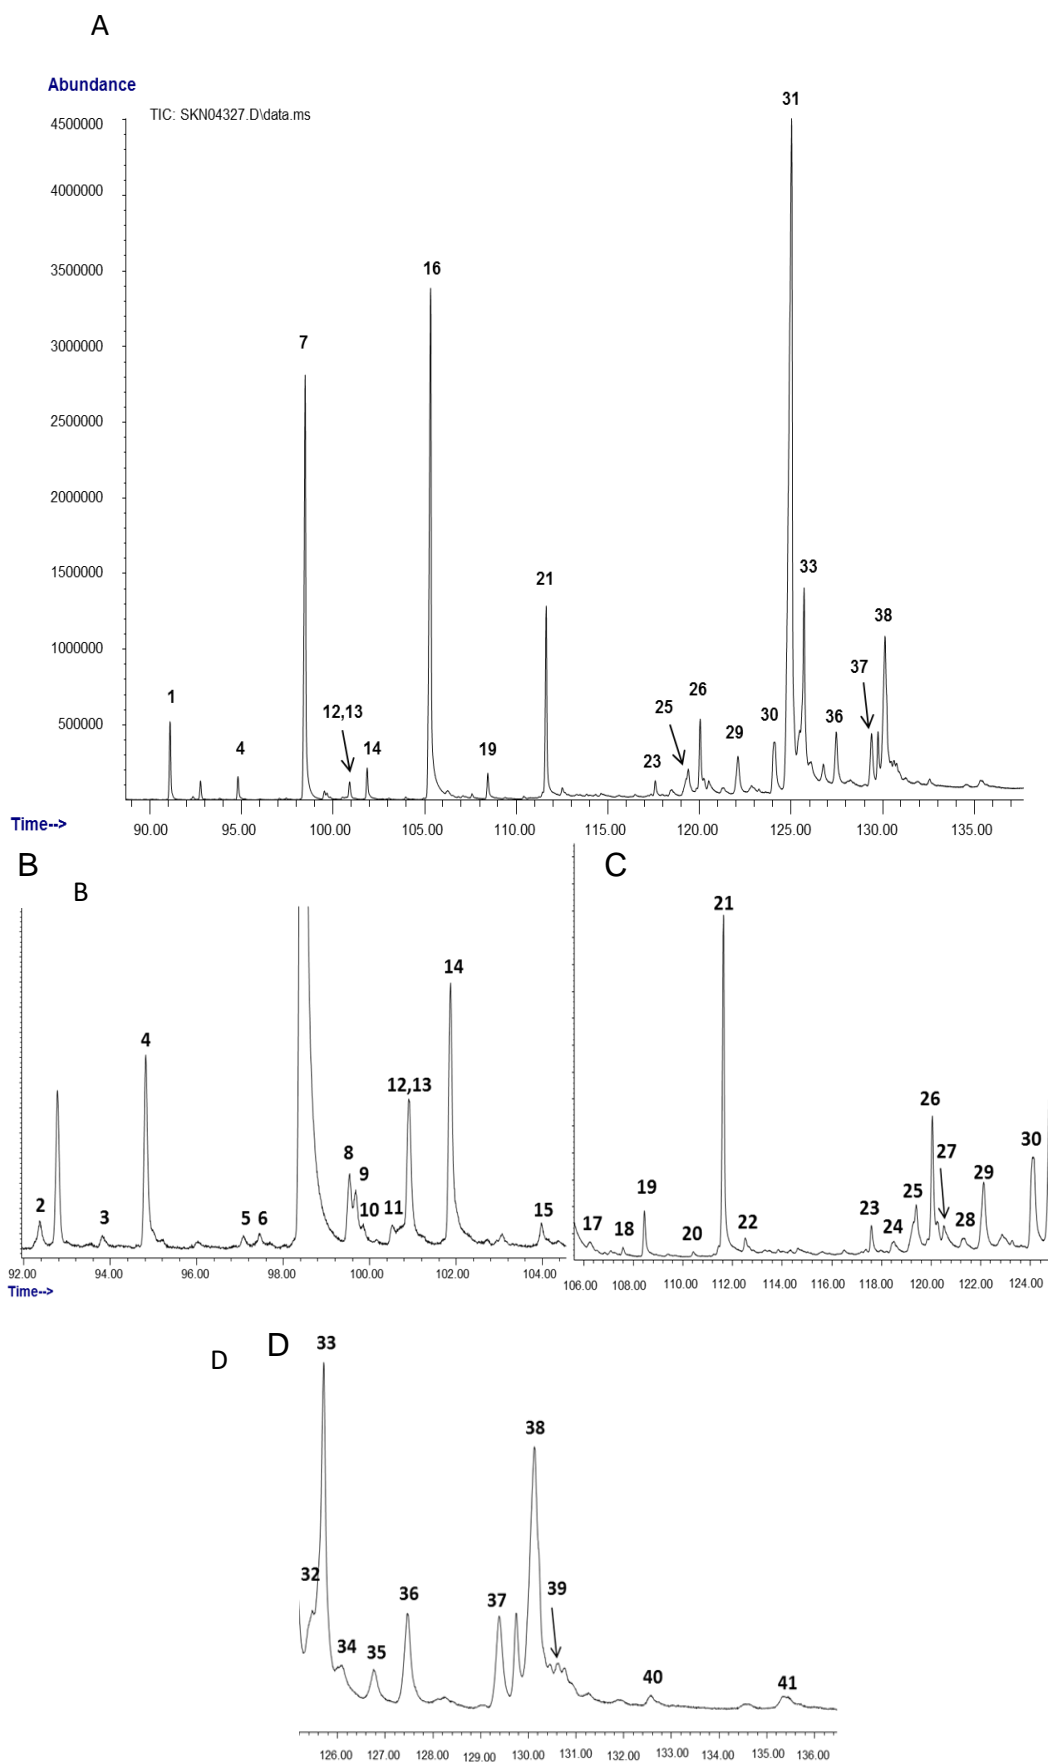

**Figure S5.** The chromatogram of the hydrocarbon profile of *C. italicus* (A) and fragments of the chromatogram in the region of 92–104 min (B), 106–124 min (C), and 126–136 min (D). Peak numbers correspond to Table S3.

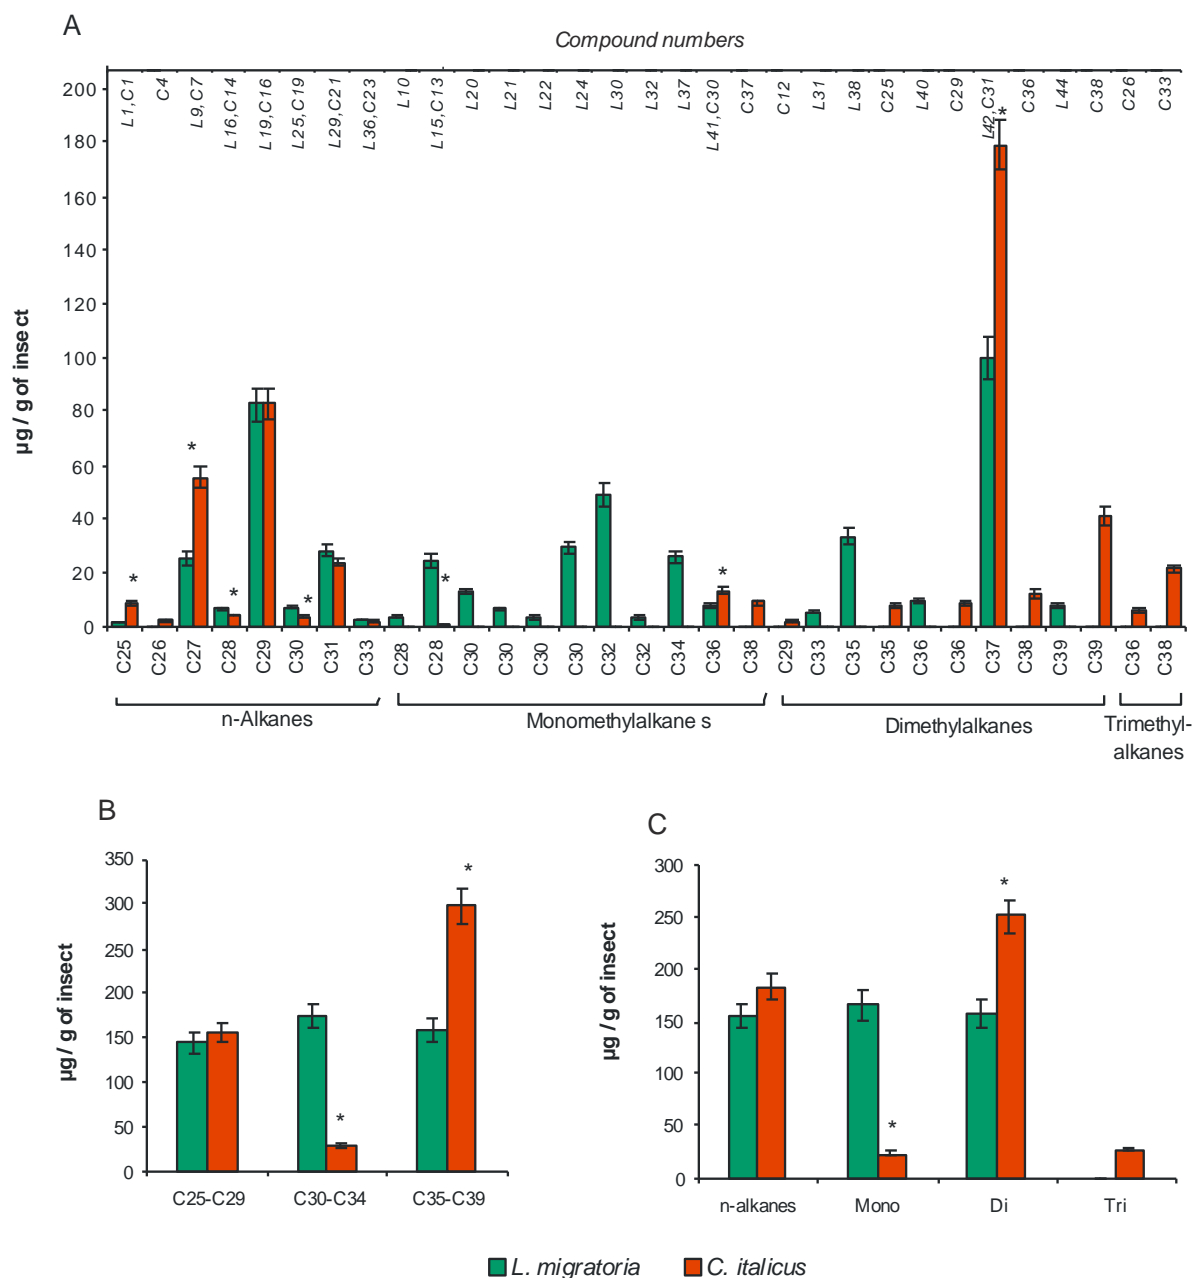

**Figure S6.** Amounts of major hydrocarbons in the epicuticles of *L. migratoria* and *C. italicus* larvae. **A.** Identified hydrocarbons; the lower *x*-axis denotes the total carbon number, and the upper *x*-axis indicates certain compounds for *L. migratoria* (L) and *C. italicus* (C) corresponding to Tables S2 and S3. **B.** The carbon number distribution. **C.** The distribution of methyl branches. \*Significant differences between *L. migratoria* and *C. italicus* (*t* test,  $P < 0.05$ , or Mann–Whitney *U* test,  $P < 0.05$ ).



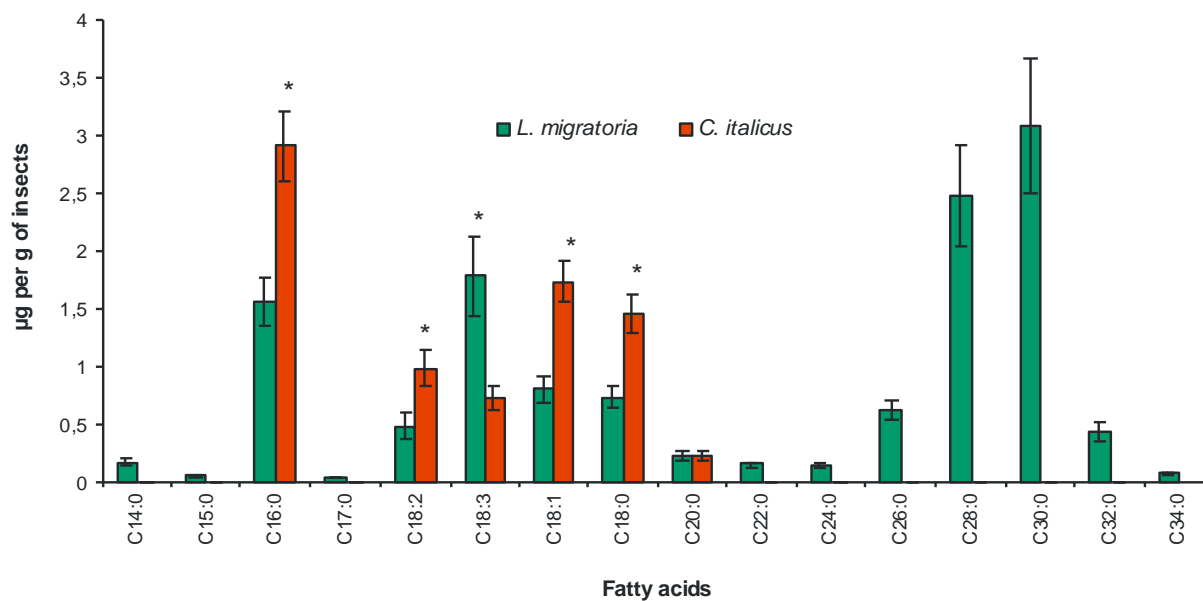

**Figure S7.** Amounts of fatty acids in epicuticles of *L. migratoria* and *C. italicus* larvae.

\*Significant differences between the species (*t* test,  $P < 0.05$ ).

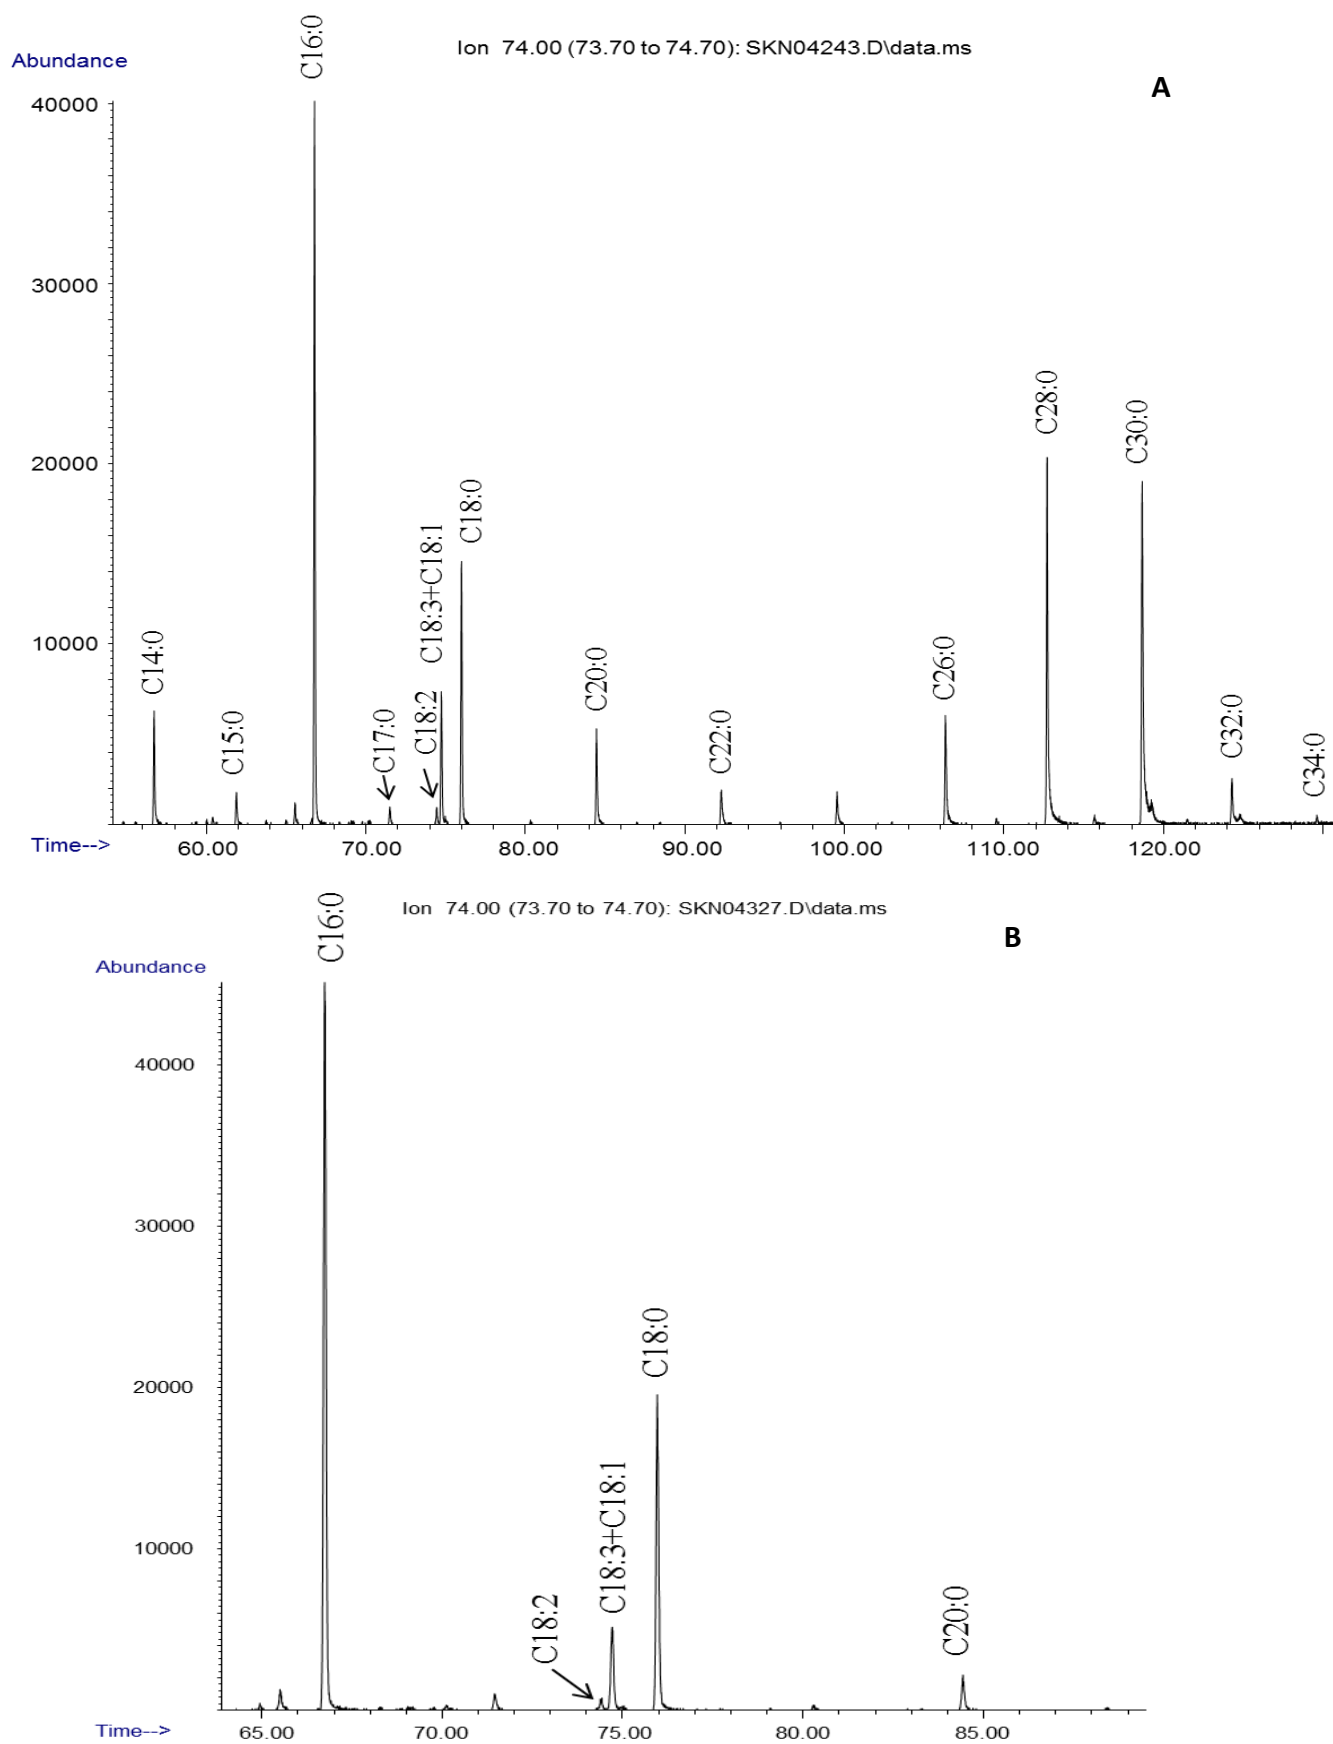

**Figure S8.** Fragments of a reconstructed chromatogram of fatty acids according to characteristic ions with  $m/z$  74 in epicuticular extracts of *L. migratoria* (A) and *C. italicus* (B).

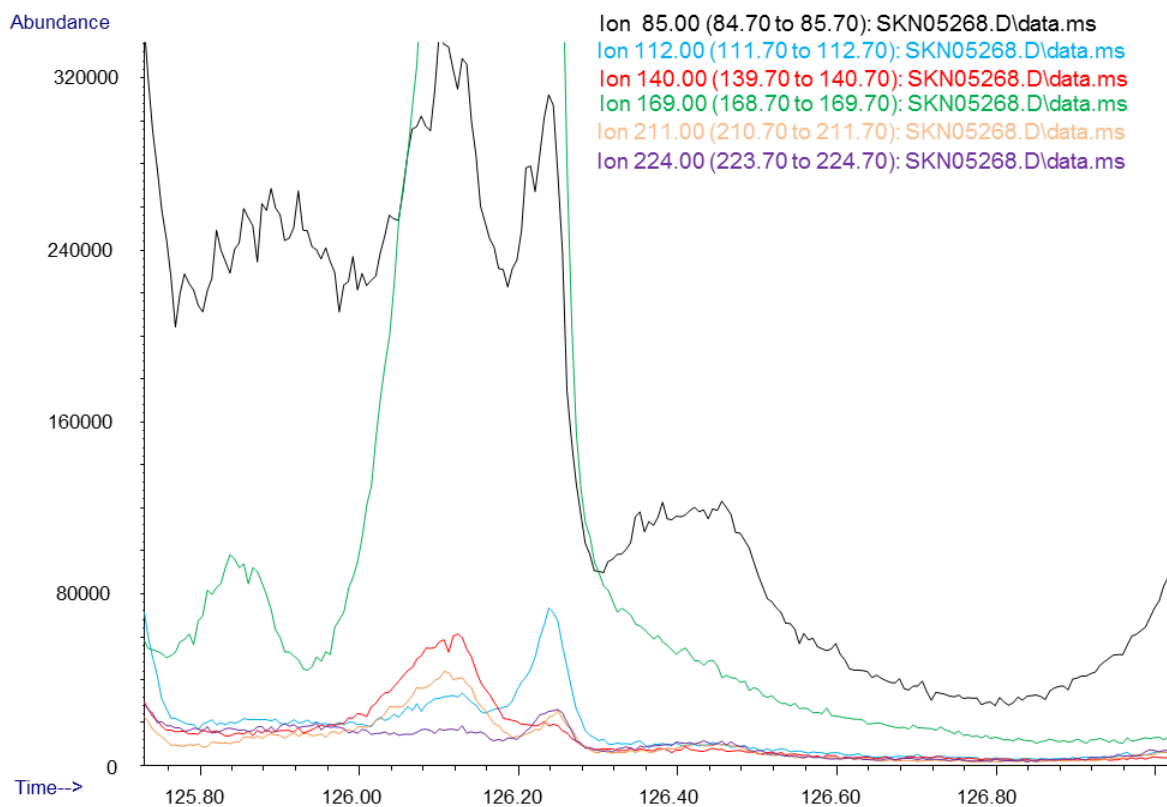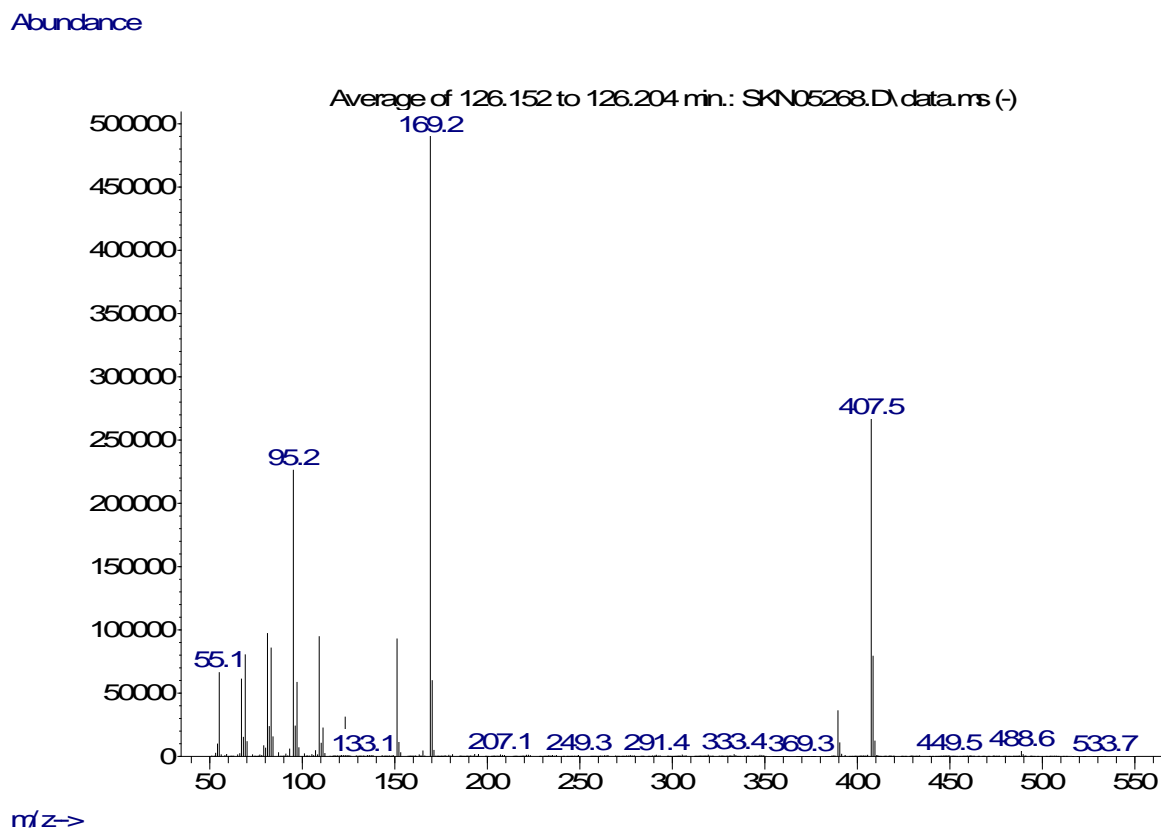

**Figure S9.** A fragment of a reconstructed chromatogram according to characteristic ions with  $m/z$  85, 112, 140, 169, 211, and 224 in the region of hydrocarbon peaks number 33 and ketone peak number 9 for *C. italicus* (A) and a mass spectrum of this ketone (B).

**Table S1.** Weights of insects and epicuticular extracts.

| <i>Locusta migratoria</i> |                    |                                  | <i>Calliptamus italicus</i> |                    |                                  |
|---------------------------|--------------------|----------------------------------|-----------------------------|--------------------|----------------------------------|
| Insect weight, g          | Extract weight, mg | Extract weights, µg/g of insects | Insect weight, g            | Extract weight, mg | Extract weights, µg/g of insects |
| 8.118                     | 4.85               | 597.4                            | 12.48                       | 7.94               | 636.2                            |
| 8.882                     | 5.4                | 608.0                            | 11.735                      | 7.3                | 622.1                            |
| 8.67                      | 5.1                | 588.2                            | 10.762                      | 7.03               | 653.2                            |
| 9.242                     | 5.6                | 605.9                            | 11.888                      | 7.76               | 652.8                            |
| 9.622                     | 6.11               | 635.0                            | 9.766                       | 5.7                | 583.7                            |
| 8.648                     | 5.25               | 607.1                            | 10.06                       | 5.53               | 549.7                            |
| Mean ± SD                 |                    | 606.9 ± 6.4                      | Mean ± SD                   |                    | 616.3 ± 16.9                     |

**Table S2.** Hydrocarbons identified in the *L. migratoria* epicuticular extract.

| N <sup>o</sup> | LRI          | Characteristic ions, <i>m/z</i>      | M <sup>+</sup> , <i>m/z</i> | Carbon number | Structure                    | µg/ g of insect | µg / mg of extract |
|----------------|--------------|--------------------------------------|-----------------------------|---------------|------------------------------|-----------------|--------------------|
| 1              | 2500         | -                                    | 352                         | C25           | <i>n</i> -C25                | 2.05±0.24       | 3.4±0.4            |
| 2              | 2527         | 196/197                              | 351 (M-15)                  | C26           | 13-methylC25                 | tr              |                    |
| 3              | 2566         | 336/337                              | 351(M-15)                   | C26           | 3-methylC25                  | tr              |                    |
| 4              | 2576         | 84/85, 196/197, 210/211, 322/323     | 365 (M-15)                  | C27           | 5,13-dimethylC25             | tr              |                    |
| 5              | 2600         | -                                    | 366                         | C26           | <i>n</i> -C26                | tr              |                    |
| 6              | 2626         | 196/197, 210/211                     | 365 (M-15)                  | C27           | 13-methylC26                 | tr              |                    |
| 7              | 2651         | 70/71, 336/337                       | 365 (M-15)                  | C27           | 4-methylC26                  | tr              |                    |
| 8              | 2667         | 350/351                              | 365(M-15)                   | C27           | 3-methylC26                  | tr              |                    |
| 9              | 2700         | -                                    | 380                         | C27           | <i>n</i> -C27                | 24.9±2.5        | 40.9±3.8           |
| 10             | 2726<br>2727 | 196/197, 224/225<br>168/169, 252/253 | 394<br>394                  | C28<br>C28    | 13-methylC27<br>11-methylC27 | 3.56±0.38       | 5.8±0.6            |
| 11             | 2730         | 140/141, 280/281                     | 394                         | C28           | 9-methylC27                  | tr              |                    |
| 12             | 2736         | 112/113, 308/309                     | 394                         | C28           | 7-methylC27                  | tr              |                    |
| 13             | 2744         | 84/85, 336/337                       | 394                         | C28           | 5-methylC27                  | tr              |                    |
| 14             | 2756         | 168/169,196/197, 238/239, 266/267    | 393(M-15)                   | C29           | 11,15-dimethylC27*           | tr              |                    |
| 15             | 2769         | 364/365                              | 394                         | C28           | 3-methylC27                  | 24.3±2.4        | 40.0±3.8           |
| 16             | 2800         | -                                    | 394                         | C28           | <i>n</i> -C28                | 6.82±0.68       | 11.2±1.1           |
| 17             | 2853         | 70/71, 364/365                       | 393 (M-15)                  | C29           | 4-methylC28                  | tr              |                    |
| 18             | 2869         | 378/379                              | 393 (M-15)                  | C29           | 3-methylC28                  | tr              |                    |
| 19             | 2900         | -                                    | 408                         | C29           | <i>n</i> -C29                | 82.6±6.4        | 135.8±9.5          |
| 20             | 2928<br>2930 | 196/197, 252/253<br>168/169, 280/281 | 422<br>422                  | C30<br>C30    | 13-methylC29<br>11-methylC29 | 12.9±1.0        | 21.3±1.5           |
| 21             | 2933         | 140/141, 308/309                     | 422                         | C30           | 9-methylC29                  | 6.82±0.73       | 11.2±1.1           |
| 22             | 2938         | 112/113, 336/337                     | 422                         | C30           | 7-methylC29                  | 3.33±0.40       | 5.5±0.6            |
| 23             | 2947         | 84/85, 364/365                       | 407 (M-15)                  | C30           | 5-methylC29                  | tr              |                    |
| 24             | 2975         | 392/393                              | 422                         | C30           | 3-methylC29                  | 29.3±2.4        | 48.3±3.8           |
| 25             | 3000         | -                                    | 422                         | C30           | <i>n</i> -C30                | 7.08±0.56       | 11.6±0.9           |
| 26             | 3028         | 182/183, 280/281; 196/197, 266/267   | 421(M-15)                   | C31           | 13- and 12-methylC30         | tr              |                    |
|                | 3030         | 168/169, 294/295                     | 421(M-15)                   | C31           | 11-methylC30                 | tr              |                    |
|                | 3031         | 154/155, 308/309                     | 421(M-15)                   | C31           | 10-methyl30                  | tr              |                    |
|                | 3033         | 140/141, 322/323                     | 421(M-15)                   | C31           | 9-methylC30                  | tr              |                    |
| 27             | 3056         | 70/71, 392/393                       | 421(M-15)                   | C31           | 4-methylC30                  | tr              |                    |
| 28             | 3072         | 406/407<br>Cholesterol               | 407(M-29)                   | C31           | 3-methylC30                  | tr<br>tr        |                    |
| 29             | 3100         | -                                    | 436                         | C31           | <i>n</i> -C31                | 28.5±2.1        | 46.8±3.2           |
| 30             | 3131         | 196/197, 280/281                     | 450                         | C32           | 13-methylC31                 | 48.8±4.3        | 80.2±6.6.          |
|                | 3133         | 168/169, 308/309                     | 450                         | C32           | 11-methylC31                 |                 |                    |
|                | 3135         | 140/141, 336/337                     | 450                         | C32           | 9-methylC31                  |                 |                    |
| 31             | 3160         | 196/197, 294/295                     | 449 (M-15)                  | C33           | 13,19-dimethylC31*           | 5.58±0.58       | 9.2±0.9            |
|                | 3160         | 168/169, 196/197, 294/295, 322/323   | 449 (M-15)                  | C33           | 11,19-dimethylC31            |                 |                    |
| 32             | 3173         | 420/421                              | 450                         | C32           | 3-methylC31                  | 3.21±0.42       | 5.3±0.7            |

|    |      |                                                                                 |            |     |                               |           |            |
|----|------|---------------------------------------------------------------------------------|------------|-----|-------------------------------|-----------|------------|
| 33 | 3200 | -                                                                               | 450        | C32 | <i>n</i> -C32                 | tr        |            |
| 34 | 3229 | 210/211, 280/281                                                                | 449(M-15)  | C33 | 14-methylC32                  | tr        |            |
|    | 3229 | 182/183, 308/309<br>196/197, 294/295                                            | 449(M-15)  | C33 | 12- and 13-<br>methylC32      | tr        |            |
|    | 3230 | 168/169, 322/323                                                                | 449(M-15)  | C33 | 11-methylC32                  | tr        |            |
| 35 | 3258 | 182/183, 196/197,<br>308/309, 322/323                                           | 463 (M-15) | C34 | 12,20-<br>dimethylC32         | tr        |            |
|    |      | b-sitosterol                                                                    |            |     |                               | tr        |            |
| 36 | 3300 | -                                                                               | 464        | C33 | <i>n</i> -C33                 | 2.61±0.29 | 4.3±0.5    |
| 37 | 3331 | 196/197,308/309                                                                 | 478        | C34 | 13-methylC33                  | 26.1±2.3  | 43.1±3.8   |
|    | 3332 | 168/169, 336/337                                                                | 478        | C34 | 11-methylC33                  |           |            |
| 38 | 3359 | 196/197, 322/323                                                                | 492        | C35 | 13,21-<br>dimethylC33         | 33.7±3.4  | 55.3±5.4   |
|    |      | 168/169, 350/351                                                                | 492        | C35 | 11,23-<br>dimethylC33*        |           |            |
|    | 3361 |                                                                                 |            |     |                               |           |            |
| 39 | 3429 | 196/197, 322/323,<br>210/211, 308/309,<br>182/182, 336/337                      | 477(M-15)  | C35 | 12-, 13- and 14-<br>methylC34 | tr        |            |
| 40 | 3459 | 182/193, 196/197,<br>336/337, 350/351                                           | 491 (M-15) | C36 | 12,22-<br>dimethylC34*        | 9.70±0.87 | 16.0±1.4   |
| 41 | 3530 | 196/197, 336/337;<br>224/225, 308/309                                           | 506        | C36 | 13- and 15-<br>methylC35      | 7.59±0.69 | 12.5±1.1   |
| 42 | 3560 | 196/197, 224/225,<br>322/323, 350/351                                           | 520        | C37 | 13,21-<br>dimethylC35         | 99.9±8.1  | 164.3±12.4 |
|    | 3563 | 196/197, 350/351                                                                | 520        | C37 | 13,23-<br>dimethylC35         |           |            |
| 43 | 3656 | 196/197, 211/210,<br>350/351, 364/365;<br>182/183, 224/225,<br>336/337, 350/351 | 519 (M-15) | C38 | 13,23 +12,22*-<br>dimethylC36 | tr        |            |
| 44 | 3756 | 196/197, 224/225,<br>350/351, 378/379                                           | 533 (M-15) | C39 | 13,23-<br>dimethylC37         | 7.72±0.70 | 12.7±1.1   |

\* presumable structure, tr - traces

**Table S3.** Hydrocarbons identified in the *C. italicus* epicuticular extract.

| №  | LRI  | Characteristic ions, $m/z$                                 | $M^+$ , $m/z$ | Carbon number | Structure             | $\mu\text{g/g}$ of insect | $\mu\text{g/mg}$ of extract |
|----|------|------------------------------------------------------------|---------------|---------------|-----------------------|---------------------------|-----------------------------|
| 1  | 2500 | -                                                          | 352           | C25           | <i>n</i> -C25         | 8.85±0.75                 | 14.4±1.3                    |
| 2  | 2527 | 196/197                                                    | 351(M-15)     | C26           | 13-methylC25          | tr                        |                             |
| 3  | 2566 | 336/337                                                    | 366           | C26           | 3-methylC25           | tr                        |                             |
| 4  | 2600 | -                                                          | 366           | C26           | <i>n</i> -C26         | 2.43±0.26                 | 4.0±0.5                     |
| 5  | 2656 | 336/337                                                    | 380           | C27           | 4-methylC26           | tr                        |                             |
| 6  | 2667 | 350/351                                                    | 380           | C27           | 3-methylC26           | tr                        |                             |
| 7  | 2700 | -                                                          | 380           | C27           | <i>n</i> -C27         | 55.5±3.5                  | 90.5±6.9                    |
| 8  | 2726 | 196/197, 224/225;<br>168/169, 252/253                      | 379(M-15)     | C28           | 13- and 11-methylC27  | tr                        |                             |
| 9  | 2731 | 140/141, 280/281                                           | 379(M-15)     | C28           | 9-methylC27           | tr                        |                             |
| 10 | 2736 | 112/113, 308/309                                           | 379(M-15)     | C28           | 7-methylC27           | tr                        |                             |
| 11 | 2755 | 168/169, 196/197,<br>238/239, 266/267                      | 393(M-15)     | C29           | 11,15-dimethylC27*    | tr                        |                             |
| 12 | 2767 | 112/113, 196/197,<br>238/239, 322/323                      | 393 (M-15)    | C29           | 7,15-dimethylC27*     | 2.22±0.21                 | 3.7±0.4                     |
| 13 | 2767 | 364/365                                                    | 394           | C28           | 3-methylC27           | 0.55±0.07                 | 0.9±0.1                     |
| 14 | 2800 | -                                                          | 394           | C28           | <i>n</i> -C28         | 4.03±0.42                 | 6.6±0.8                     |
| 15 | 2858 | 364/365                                                    | 408           | C29           | 4-methylC28           | tr                        |                             |
| 16 | 2900 | -                                                          | 408           | C29           | <i>n</i> -C29         | 82.7±5.4                  | 134.9±10.2                  |
| 17 | 2927 | 197/196, 252/253,<br>224/225                               | 407(M-15)     | C30           | 13- and 15-methylC29  | tr                        |                             |
|    | 2928 | 168/169, 280/281                                           | 407(M-15)     | C30           | 11-methylC29          | tr                        |                             |
| 18 | 2970 | 392/393                                                    | 407(M-15)     | C30           | 3-methylC29           | tr                        |                             |
| 19 | 3000 | -                                                          | 422           | C30           | <i>n</i> -C30         | 3.45±0.33                 | 5.6±0.6                     |
| 20 | 3060 | 392/393                                                    | 421(M-15)     | C31           | 4-methylC30           | tr                        |                             |
| 21 | 3100 | -                                                          | 436           | C31           | <i>n</i> -C31         | 23.9±1.8                  | 39.1±3.6                    |
| 22 | 3128 | 168/169, 196/197,<br>280/281, 308/309                      | 435(M-15)     | C32           | 13- and 11-methylC31  | tr                        |                             |
|    | 3134 | 140/141, 336/337                                           | 435(M-15)     | C32           | 9-methylC31           | tr                        |                             |
| 23 | 3300 | -                                                          | 464           | C33           | <i>n</i> -C33         | 2.08±0.31                 | 3.4±0.6                     |
| 24 | 3327 | 196/197, 224/225,<br>280/281, 308/309                      | 463(M-15)     | C34           | 15- and 13-methylC33  | tr                        |                             |
|    | 3331 | 168/169, 336/337                                           | 463(M-15)     | C34           | 11-methylC33          | tr                        |                             |
| 25 | 3354 | 196/197, 224/225,<br>294/295, 322/323                      | 477 (M-15)    | C35           | 13,19-dimethylC33     | 7.88±0.87                 | 12.9±1.5                    |
|    | 3358 | 168/169, 224/225,<br>294/295, 350/351                      | 477 (M-15)    | C35           | 11,19-dimethylC33     |                           |                             |
|    | 3362 | 140/141, 224/225,<br>294/295, 378/379                      | 477 (M-15)    | C35           | 9,19-dimethylC33      |                           |                             |
| 26 | 3384 | 140/141, 210/211,<br>224/225, 308/309,<br>322/323, 392/393 | 506           | C36           | 9,13,19*-trimethylC33 | 6.03±0.50                 | 9.8±0.9                     |
| 27 | 3402 | 84/85, 224/225,<br>238/239, 294/295,<br>308/309, 448/449   | 506           | C36           | 5,15,19-trimethylC33* | tr                        |                             |
|    | 3406 | 84/85, 182/183,<br>196/197, 336/337,<br>350/351, 448/449   | 506           | C36           | 5,11,21-trimethylC33* | tr                        |                             |

|    |      |                                                                        |            |     |                              |           |            |
|----|------|------------------------------------------------------------------------|------------|-----|------------------------------|-----------|------------|
| 28 | 3432 | 224/225, 238/239, 280/281, 294/295                                     | 492        | C35 | 15- and 16-methylC34         | tr        |            |
|    | 3435 | 182/183, 196/197, 322/323, 336/337                                     | 492        | C35 | 12- and 13-methylC34         | tr        |            |
|    | 3437 | 168/169, 350/351                                                       | 492        | C35 | 11-methylC34                 | tr        |            |
| 29 | 3458 | 168/169, 238/239, 294/295, 364/365                                     | 491 (M-15) | C36 | 11,15-dimethylC34*           | 8.48±0.77 | 13.9±1.4   |
| 30 | 3528 | 252/253, 280/281                                                       | 506        | C36 | 17-methylC35                 | 13.4±1.5  | 21.9±2.8   |
|    | 3529 | 224/225, 308/309                                                       | 506        | C36 | 15-methylC35                 |           |            |
|    | 3530 | 196/197, 336/337                                                       | 506        | C36 | 13-methylC35                 |           |            |
|    | 3532 | 168/169, 364/365                                                       | 506        | C36 | 11-methylC35                 |           |            |
| 31 | 3558 | 196/197, 252/253, 294/295, 350/351                                     | 520        | C37 | 13,19-dimethylC35            | 179.0±9.4 | 292.0±19.1 |
|    | 3561 | 168/169, 252/253, 294/295, 378/379                                     | 520        | C37 | 11,19-dimethylC35            |           |            |
|    | 3564 | 168/169, 378/379                                                       | 520        | C37 | 11,25-dimethylC35*           |           |            |
|    | 3566 | 168/169, 224/225, 322/323, 378/379                                     | 520        | C37 | 11,21-dimethylC35*           |           |            |
| 32 | 3582 | 168/169, 196/197, 238/239, 322/323, 364/365, 392/393                   | 519 (M-15) | C38 | 11,15,23-trimethylC35        | tr        |            |
| 33 | 3587 | 140/141, 210/211, 252/253, 308/309, 350/351, 420/421                   | 534        | C38 | 9,13,19-trimethylC35*        | 21.7±1.0  | 35.3±2.2   |
|    | 3590 | 112/113, 224/225, 266/267, 294/295, 336/337, 448/449                   | 534        | C38 | 7,17,21-trimethylC35*        |           |            |
| 34 | 3605 | 84/85, 210/211, 224/225, 350/351, 336/337, 476/477                     | 534        | C38 | 5,13,21-trimethylC35*        | tr        |            |
|    |      | 84/85, 182/183, 224/225, 336/337, 378/379, 476/477                     | 534        | C38 | 5,11,21-trimethylC35*        | tr        |            |
|    |      | 84/85, 154/155, 224/225, 336/337, 406/407, 476/477                     | 534        | C38 | 5,9,21-trimethylC35*         | tr        |            |
| 35 | 3630 | 182/183, 196/197, 224/225, 322/323, 350/351, 364/365                   | 520        | C37 | 12-,13- and 15-methylC36*    | tr        |            |
| 36 | 3656 | 168/169, 182/183, 252/253, 266/267, 294/295, 308/309, 378/379, 392/393 | 534        | C38 | 12,20- and 11,19-dimethylC36 | 12.1±1.5  | 19.9±2.9   |
| 37 | 3727 | 252/253, 308/309                                                       | 534        | C38 | 17-methylC37                 | 9.08±0.99 | 14.8±1.8   |
|    | 3731 | 196/197, 364/365                                                       | 534        | C38 | 13-methylC37                 |           |            |
|    | 3733 | 168/169, 392/393                                                       | 534        | C38 | 11-methylC37                 |           |            |
| 38 | 3757 | 196/197, 378/379                                                       | 548        | C39 | 13,25-dimethylC37            | 40.9±3.5  | 66.9±6.8   |
|    | 3760 | 168/169, 252/253, 322/323, 406/407                                     | 548        | C39 | 11,21-dimethylC37*           |           |            |
| 39 | 3779 | 168/169, 238/239, 252/253, 336/337, 350/351, 420/421                   | 547 (M-15) | C40 | 11,15,21-trimethylC37*       | tr        |            |



|    |      |                                                            |            |     |                                       |    |
|----|------|------------------------------------------------------------|------------|-----|---------------------------------------|----|
| 40 | 3854 | 182/183, 252/253,<br>280/281, 308/309,<br>336/337, 406/407 | 547 (M-15) | C40 | 12,20*- and<br>12,22*-<br>dimethylC38 | tr |
| 41 | 3950 | 168/169, 434/435                                           | 547 (M-29) | C41 | 11,29-<br>dimethylC39*                | tr |
|    | 3953 | 168/169, 196/197,<br>406/407, 434/435                      | 547 (M-29) | C41 | 11,27-<br>dimethylC39*                | tr |
|    | 3955 | 140/141, 462/463                                           | 547 (M-29) | C41 | 9,31-dimethylC39*                     | tr |

\*presumable structure, tr – traces

**Table S4.** Fatty acid methyl esters identified in the *L. migratoria* epicuticular extract.

| Nº     | LRI  | M+ ( <i>m/z</i> ) | Structure | Name                       | µg / mg of extract | µg / g of insect |
|--------|------|-------------------|-----------|----------------------------|--------------------|------------------|
| 1      | 1726 | 242               | C14:0     | Methyl tetradecanoate      | 0.29±0.06          | 0.17 ±0.04       |
| 2      | 1827 | 256               | C15:0     | Methyl pentadecanoate      | 0.09 ±0.02         | 0.06 ±0.01       |
| 3      | 1927 | 270               | C16:0     | Methyl hexadecanoate       | 2.59 ±0.35         | 1.56 ±0.21       |
| 4      | 2025 | 284               | C17:0     | Methyl heptadecanoate      | 0.07 ±0.01         | 0.04 ±0.01       |
| 5      | 2091 | 294               | C18:2     | Methyl linoleate           | 0.81 ±0.19         | 0.49 ±0.11       |
| 6      | 2097 | 292               | C18:3     | Methyl linolenate          | 2.95 ±0.57         | 1.78 ±0.34       |
| 7      | 2099 | 296               | C18:1     | Methyl oleate              | 1.33 ±0.19         | 0.80 ±0.11       |
| 8      | 2127 | 298               | C18:0     | Methyl octadecanoate       | 1.21 ±0.16         | 0.73 ±0.09       |
| 9      | 2325 | 326               | C20:0     | Methyl eicosanoate         | 0.37 ±0.06         | 0.22 ±0.03       |
| 10     | 2524 | 354               | C22:0     | Methyl docosanoate         | 0.25 ±0.04         | 0.15 ±0.02       |
| 11     | 2726 | 382               | C24:0     | Methyl tetracosanoate      | 0.24 ±0.04         | 0.14 ±0.02       |
| 12     | 2931 | 410               | C26:0     | Methyl hexacosanoate       | 1.02 ±0.14         | 0.62 ±0.09       |
| 13     | 3134 | 438               | C28:0     | Methyl octacosanoate       | 4.09 ±0.71         | 2.48 ±0.43       |
| 14     | 3336 | 466               | C30:0     | Methyl triacontanoate      | 5.08 ±0.95         | 3.08 ±0.57       |
| 15     | 3539 | 494               | C32:0     | Methyl dotriacontanoate    | 0.73 ±0.13         | 0.44 ±0.08       |
| 16     | 3740 | 522               | C34:0     | Methyl tetratriacontanoate | 0.11 ±0.01         | 0.07 ±0.01       |
| Total: |      |                   |           |                            | 21.1±2.5           | 12.8±1.5         |

**Table S5.** Fatty acid methyl esters identified in the *C. italicus* epicuticular extract.

| Nº     | LRI  | M+ ( <i>m/z</i> ) | Structure | Name                 | µg / mg of extract | µg / g of insect |
|--------|------|-------------------|-----------|----------------------|--------------------|------------------|
| 1      | 1927 | 270               | C16:0     | Methyl hexadecanoate | 4.8±0.5            | 2.9 ±0.3         |
| 2      | 2091 | 294               | C18:2     | Methyl linoleate     | 1.6 ±0.2           | 0.98 ±0.16       |
| 3      | 2097 | 292               | C18:3     | Methyl linolenate    | 2.1± 0.4           | 1.31 ±0.23       |
| 4      | 2099 | 296               | C18:1     | Methyl oleate        | 2.8 ±0.3           | 1.74 ±0.17       |
| 5      | 2127 | 298               | C18:0     | Methyl octadecanoate | 2.4 ±0.3           | 1.45 ±0.17       |
| 6      | 2325 | 326               | C20:0     | Methyl eicosanoate   | 0.36 ±0.06         | 0.22 ±0.04       |
| Total: |      |                   |           |                      | 14.1±1.7           | 8.6±0.9          |

**Table S6.** Ketones identified in the *C. italicus* epicuticular extract.

| Nº     | LRI  | Structure              | Characteristic ions | Carbon number | µg/mg of extracts | µg/g of insect |
|--------|------|------------------------|---------------------|---------------|-------------------|----------------|
| 1      | 3180 | tetratriacontan-11-one | 169, 351            | C34           | tr*               |                |
| 2      | 3188 | tetratriacontan-9-one  | 141, 379            | C34           | tr                |                |
| 3      | 3281 | pentatriacontan-11-one | 169, 365            | C35           | tr                |                |
| 4      | 3285 | pentatriacontan-10-one | 155, 379            | C35           | tr                |                |
| 5      | 3384 | hexatriacontan-11-one  | 169, 379            | C36           | 9.0±1.3           | 0.54±0.08      |
| 6      | 3392 | hexatriacontan-9-one   | 141, 407            | C36           | tr                |                |
| 7      | 3485 | heptatriacontan-11-one | 169, 393            | C37           | tr                |                |
| 8      | 3488 | heptatriacontan-10-one | 155, 407            | C37           | tr                |                |
| 9      | 3590 | octatriacontan-11-one  | 169, 407            | C38           | 41.8±2.7          | 2.6±0.15       |
| 10     | 3685 | nonatriacontan-12-one  | 183, 407            | C39           | tr                |                |
| 11     | 3688 | nonatriacontan-11-one  | 169, 421            | C39           | tr                |                |
| 12     | 3784 | tetracontan-13-one     | 197, 407            | C40           | tr                |                |
| Total: |      |                        |                     |               | 50.8±3.6          | 3.1±0.2        |

\* traces
